# Supplementary material
Source: PubMed Central journal article supplement (PMC4788026)

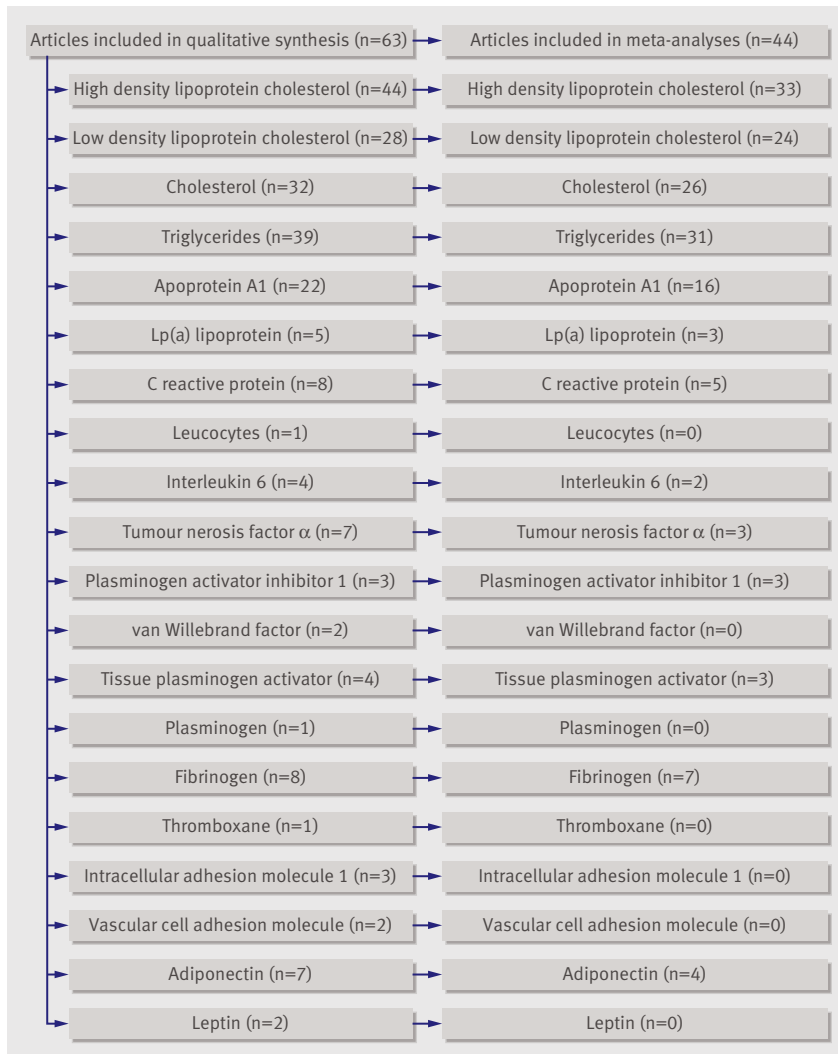

Supplement: bris804872.wf1_default.pdf [file bris804872.wf1_default.pdf]
